# Supplementary material for: Paternal nutritional programming of lipid metabolism is propagated through sperm and seminal plasma
Source: PubMed Central journal article supplement (PMC8828597; doi:10.1007/s11306-022-01869-9), 2022-02-10
Supplement: 11306_2022_1869_MOESM4_ESM.pdf [file 11306_2022_1869_MOESM4_ESM.pdf]

## Negative ionisation mode

| <i>m/z</i> | Lipid variable                  | Isobar 1 | Isobar 2 |
|------------|---------------------------------|----------|----------|
| 568.4946   | Cer(32:1) <sub>[M+OAC]</sub> 1- |          |          |
| 596.5259   | Cer(34:1) <sub>[M+OAC]</sub> 1- |          |          |
| 536.5048   | Cer(34:1) <sub>[M-H]</sub> 1-   |          |          |
| 564.5361   | Cer(36:1) <sub>[M-H]</sub> 1-   |          |          |
| 562.5205   | Cer(36:2) <sub>[M-H]</sub> 1-   |          |          |
| 592.5674   | Cer(38:1) <sub>[M-H]</sub> 1-   |          |          |
| 590.5518   | Cer(38:2) <sub>[M-H]</sub> 1-   |          |          |
| 666.6042   | Cer(39:1) <sub>[M+OAC]</sub> 1- |          |          |
| 680.6198   | Cer(40:1) <sub>[M+OAC]</sub> 1- |          |          |
| 620.5987   | Cer(40:1) <sub>[M-H]</sub> 1-   |          |          |
| 618.5831   | Cer(40:2) <sub>[M-H]</sub> 1-   |          |          |
| 694.6355   | Cer(41:1) <sub>[M+OAC]</sub> 1- |          |          |
| 634.6144   | Cer(41:1) <sub>[M-H]</sub> 1-   |          |          |
| 692.6198   | Cer(41:2) <sub>[M+OAC]</sub> 1- |          |          |
| 648.6300   | Cer(42:1) <sub>[M-H]</sub> 1-   |          |          |
| 682.5910   | Cer(42:2) <sub>[M+Cl]</sub> 1-  |          |          |
| 646.6144   | Cer(42:2) <sub>[M-H]</sub> 1-   |          |          |
| 1401.9807  | CL(68:3) <sub>[M-H]</sub> 1-    |          |          |
| 1399.9650  | CL(68:4) <sub>[M-H]</sub> 1-    |          |          |
| 1436.0589  | CL(70:0) <sub>[M-H]</sub> 1-    |          |          |
| 717.5253   | CL(70:01) <sub>[M]</sub> 2-     |          |          |
| 715.5096   | CL(70:03) <sub>[M]</sub> 2-     |          |          |
| 713.4940   | CL(70:05) <sub>[M]</sub> 2-     |          |          |
| 1434.0433  | CL(70:1) <sub>[M-H]</sub> 1-    |          |          |
| 1430.0120  | CL(70:3) <sub>[M-H]</sub> 1-    |          |          |
| 1427.9963  | CL(70:4) <sub>[M-H]</sub> 1-    |          |          |
| 1425.9807  | CL(70:5) <sub>[M-H]</sub> 1-    |          |          |
| 1423.9650  | CL(70:6) <sub>[M-H]</sub> 1-    |          |          |
| 1450.0651  | CL(71:0) <sub>[M-H]</sub> 1-    |          |          |
| 1448.0495  | CL(71:1) <sub>[M-H]</sub> 1-    |          |          |
| 1464.0902  | CL(72:0) <sub>[M-H]</sub> 1-    |          |          |
| 1462.0746  | CL(72:1) <sub>[M-H]</sub> 1-    |          |          |
| 1458.0433  | CL(72:3) <sub>[M-H]</sub> 1-    |          |          |
| 1456.0276  | CL(72:4) <sub>[M-H]</sub> 1-    |          |          |
| 1454.0120  | CL(72:5) <sub>[M-H]</sub> 1-    |          |          |
| 1451.9963  | CL(72:6) <sub>[M-H]</sub> 1-    |          |          |
| 1449.9807  | CL(72:7) <sub>[M-H]</sub> 1-    |          |          |
| 1447.9650  | CL(72:8) <sub>[M-H]</sub> 1-    |          |          |
| 1474.0651  | CL(73:2) <sub>[M-H]</sub> 1-    |          |          |
| 1472.0495  | CL(73:3) <sub>[M-H]</sub> 1-    |          |          |
| 1470.0338  | CL(73:4) <sub>[M-H]</sub> 1-    |          |          |
| 1468.0182  | CL(73:5) <sub>[M-H]</sub> 1-    |          |          |
| 1492.1215  | CL(74:0) <sub>[M-H]</sub> 1-    |          |          |
| 743.5409   | CL(74:03) <sub>[M]</sub> 2-     |          |          |
| 1490.1059  | CL(74:1) <sub>[M-H]</sub> 1-    |          |          |
| 1471.9650  | CL(74:10) <sub>[M-H]</sub> 1-   |          |          |
| 1488.0902  | CL(74:2) <sub>[M-H]</sub> 1-    |          |          |
| 1484.0589  | CL(74:4) <sub>[M-H]</sub> 1-    |          |          |
| 1482.0433  | CL(74:5) <sub>[M-H]</sub> 1-    |          |          |
| 1480.0276  | CL(74:6) <sub>[M-H]</sub> 1-    |          |          |
| 1478.0120  | CL(74:7) <sub>[M-H]</sub> 1-    |          |          |
| 1475.9963  | CL(74:8) <sub>[M-H]</sub> 1-    |          |          |
| 1473.9807  | CL(74:9) <sub>[M-H]</sub> 1-    |          |          |
| 1502.0964  | CL(75:2) <sub>[M-H]</sub> 1-    |          |          |
| 1494.0338  | CL(75:6) <sub>[M-H]</sub> 1-    |          |          |
| 1492.0182  | CL(75:7) <sub>[M-H]</sub> 1-    |          |          |
| 1490.0025  | CL(75:8) <sub>[M-H]</sub> 1-    |          |          |
| 1520.1528  | CL(76:0) <sub>[M-H]</sub> 1-    |          |          |
| 753.5253   | CL(76:07) <sub>[M]</sub> 2-     |          |          |
| 1499.9963  | CL(76:10) <sub>[M-H]</sub> 1-   |          |          |

|                                |                        |
|--------------------------------|------------------------|
| 1497.9807 CL(76:11)_[M-H]1-    |                        |
| 1495.9650 CL(76:12)_[M-H]1-    |                        |
| 1516.1215 CL(76:2)_[M-H]1-     |                        |
| 1514.1059 CL(76:3)_[M-H]1-     |                        |
| 1504.0276 CL(76:8)_[M-H]1-     |                        |
| 1502.0120 CL(76:9)_[M-H]1-     |                        |
| 1530.1277 CL(77:2)_[M-H]1-     |                        |
| 1518.0338 CL(77:8)_[M-H]1-     |                        |
| 1516.0182 CL(77:9)_[M-H]1-     |                        |
| 774.5957 CL(78:00)_[M]2-       |                        |
| 768.5487 CL(78:06)_[M]2-       |                        |
| 1528.0276 CL(78:10)_[M-H]1-    |                        |
| 1523.9963 CL(78:12)_[M-H]1-    |                        |
| 1521.9807 CL(78:13)_[M-H]1-    |                        |
| 1519.9650 CL(78:14)_[M-H]1-    |                        |
| 1544.1528 CL(78:2)_[M-H]1-     |                        |
| 1530.0433 CL(78:9)_[M-H]1-     |                        |
| 1538.0025 CL(79:12)_[M-H]1-    |                        |
| 675.5331 LPA(35:0)_[M]-        |                        |
| 540.3307 LPC(15:0)_[M+OAC]1-   |                        |
| 566.3463 LPC(17:1)_[M+OAC]1-   | LPS(21:0)_[M-H]1-      |
| 554.3019 LPC(18:2)_[M+Cl]1-    |                        |
| 578.3463 LPC(18:2)_[M+OAC]1-   | LPS(22:1)_[M-H]1-      |
| 590.3463 LPC(19:3)_[M+OAC]1-   |                        |
| 604.3620 LPC(20:3)_[M+OAC]1-   | LPS(24:2)_[M-H]1-      |
| 578.3019 LPC(20:4)_[M+Cl]1-    |                        |
| 602.3463 LPC(20:4)_[M+OAC]1-   | LPS(24:3)_[M-H]1-      |
| 612.3801 LPC(22:1)_[M+Cl]1-    |                        |
| 610.3645 LPC(22:2)_[M+Cl]1-    |                        |
| 634.4089 LPC(22:2)_[M+OAC]1-   | LPS(26:1)_[M-H]1-      |
| 602.3019 LPC(22:6)_[M+Cl]1-    |                        |
| 626.3463 LPC(22:6)_[M+OAC]1-   |                        |
| 666.4715 LPC(24:0)_[M+OAC]1-   |                        |
| 454.2575 LPC(O-10:1)_[M+OAC]1- |                        |
| 570.3696 LPC-2O(20:1)_[M+Cl]1- |                        |
| 628.4478 LPC-2O(24:0)_[M+Cl]1- |                        |
| 542.3383 LPC-O_18:1)_[M+Cl]1-  |                        |
| 410.2313 LPE(13:0)_[M-H]1-     |                        |
| 422.2313 LPE(14:1)_[M-H]1-     |                        |
| 452.2783 LPE(16:0)_[M-H]1-     |                        |
| 480.3096 LPE(18:0)_[M-H]1-     |                        |
| 478.2939 LPE(18:1)_[M-H]1-     |                        |
| 508.3409 LPE(20:0)_[M-H]1-     |                        |
| 506.3252 LPE(20:1)_[M-H]1-     |                        |
| 504.3096 LPE(20:2)_[M-H]1-     |                        |
| 500.2783 LPE(20:4)_[M-H]1-     |                        |
| 528.3096 LPE(22:4)_[M-H]1-     |                        |
| 524.2783 LPE(22:6)_[M-H]1-     |                        |
| 436.2833 LPE-P(16:0)_[M-H]1-   |                        |
| 619.2889 LPI(20:4)_[M-H]1-     |                        |
| 645.4495 PA(32:1)_[M-H]1-      |                        |
| 673.4808 PA(34:1)_[M-H]1-      | TG_oxid(35:1)_[M+Cl]1- |
| 671.4652 PA(34:2)_[M-H]1-      | TG_oxid(35:2)_[M+Cl]1- |
| 687.4965 PA(35:1)_[M-H]1-      | TG_oxid(36:1)_[M+Cl]1- |
| 703.5278 PA(36:0)_[M-H]1-      | TG_oxid(37:0)_[M+Cl]1- |
| 701.5121 PA(36:1)_[M-H]1-      | TG_oxid(37:1)_[M+Cl]1- |
| 699.4965 PA(36:2)_[M-H]1-      | TG_oxid(37:2)_[M+Cl]1- |
| 695.4652 PA(36:4)_[M-H]1-      |                        |
| 705.4495 PA(37:6)_[M-H]1-      |                        |
| 721.4808 PA(38:5)_[M-H]1-      |                        |
| 719.4652 PA(38:6)_[M-H]1-      |                        |
| 594.3413 PC(18:1)_[M+OAC]1-    | PS(23:0)_[M-H]1-       |
| 584.3125 PC(19:1)_[M+Cl]1-     |                        |

|                             |                      |                    |
|-----------------------------|----------------------|--------------------|
| 608.3569 PC(19:1)_[M+OAC]1- |                      |                    |
| 636.3882 PC(21:1)_[M+OAC]1- | PS(25:0)_[M-H]1-     |                    |
| 734.4978 PC(28:1)_[M+OAC]1- | PS(32:0)_[M-H]1-     |                    |
| 732.4821 PC(28:2)_[M+OAC]1- | PS(32:1)_[M-H]1-     |                    |
| 758.4978 PC(30:3)_[M+OAC]1- | PS(34:2)_[M-H]1-     |                    |
| 778.5604 PC(31:0)_[M+OAC]1- |                      |                    |
| 786.5291 PC(32:3)_[M+OAC]1- | PS(36:2)_[M-H]1-     |                    |
| 784.5134 PC(32:4)_[M+OAC]1- | PS(36:3)_[M-H]1-     |                    |
| 782.4978 PC(32:5)_[M+OAC]1- | PS(36:4)_[M-H]1-     |                    |
| 778.5159 PC(33:2)_[M+Cl]1-  |                      |                    |
| 802.5604 PC(33:2)_[M+OAC]1- | PS(37:1)_[M-H]1-     |                    |
| 800.5447 PC(33:3)_[M+OAC]1- | PS(37:2)_[M-H]1-     |                    |
| 798.5291 PC(33:4)_[M+OAC]1- | PS(37:3)_[M-H]1-     |                    |
| 794.5472 PC(34:1)_[M+Cl]1-  |                      |                    |
| 818.5917 PC(34:1)_[M+OAC]1- | PS(38:0)_[M-H]1-     |                    |
| 792.5316 PC(34:2)_[M+Cl]1-  |                      |                    |
| 816.5760 PC(34:2)_[M+OAC]1- | PS(38:1)_[M-H]1-     |                    |
| 814.5604 PC(34:3)_[M+OAC]1- | PS(38:2)_[M-H]1-     |                    |
| 812.5447 PC(34:4)_[M+OAC]1- | PS(38:3)_[M-H]1-     |                    |
| 810.5291 PC(34:5)_[M+OAC]1- | PS(38:4)_[M-H]1-     |                    |
| 808.5134 PC(34:6)_[M+OAC]1- | PS(38:5)_[M-H]1-     |                    |
| 808.5629 PC(35:1)_[M+Cl]1-  |                      |                    |
| 828.5760 PC(35:3)_[M+OAC]1- | PS(39:2)_[M-H]1-     |                    |
| 800.5003 PC(35:5)_[M+Cl]1-  |                      |                    |
| 822.5291 PC(35:6)_[M+OAC]1- | PS(39:5)_[M-H]1-     |                    |
| 848.6386 PC(36:0)_[M+OAC]1- |                      |                    |
| 846.6230 PC(36:1)_[M+OAC]1- | PS(40:0)_[M-H]1-     |                    |
| 820.5629 PC(36:2)_[M+Cl]1-  |                      |                    |
| 844.6073 PC(36:2)_[M+OAC]1- | PS(40:1)_[M-H]1-     |                    |
| 842.5917 PC(36:3)_[M+OAC]1- | PS(40:2)_[M-H]1-     |                    |
| 816.5316 PC(36:4)_[M+Cl]1-  |                      |                    |
| 840.5760 PC(36:4)_[M+OAC]1- | PS(40:3)_[M-H]1-     |                    |
| 838.5604 PC(36:5)_[M+OAC]1- | PS(40:4)_[M-H]1-     |                    |
| 834.5291 PC(36:7)_[M+OAC]1- | PS(40:6)_[M-H]1-     |                    |
| 808.4690 PC(36:8)_[M+Cl]1-  |                      |                    |
| 832.5134 PC(36:8)_[M+OAC]1- | PS(40:7)_[M-H]1-     |                    |
| 860.6386 PC(37:1)_[M+OAC]1- | PS(41:0)_[M-H]1-     |                    |
| 858.6230 PC(37:2)_[M+OAC]1- | PS(41:1)_[M-H]1-     |                    |
| 852.5760 PC(37:5)_[M+OAC]1- | PS(41:4)_[M-H]1-     |                    |
| 850.5604 PC(37:6)_[M+OAC]1- | PS(41:5)_[M-H]1-     |                    |
| 824.5003 PC(37:7)_[M+Cl]1-  |                      |                    |
| 848.5447 PC(37:7)_[M+OAC]1- | PS(41:6)_[M-H]1-     |                    |
| 852.6255 PC(38:0)_[M+Cl]1-  |                      |                    |
| 876.6699 PC(38:0)_[M+OAC]1- |                      |                    |
| 850.6098 PC(38:1)_[M+Cl]1-  | PC-O(38:6)_[M+OAC]1- | PS-P(42:1)_[M-H]1- |
| 874.6543 PC(38:1)_[M+OAC]1- | PS(42:0)_[M-H]1-     |                    |
| 848.5942 PC(38:2)_[M+Cl]1-  |                      |                    |
| 872.6386 PC(38:2)_[M+OAC]1- | PS(42:1)_[M-H]1-     |                    |
| 870.6230 PC(38:3)_[M+OAC]1- | PS(42:2)_[M-H]1-     |                    |
| 844.5629 PC(38:4)_[M+Cl]1-  |                      |                    |
| 868.6073 PC(38:4)_[M+OAC]1- | PS(42:3)_[M-H]1-     |                    |
| 866.5917 PC(38:5)_[M+OAC]1- | PS(42:4)_[M-H]1-     |                    |
| 840.5316 PC(38:6)_[M+Cl]1-  |                      |                    |
| 864.5760 PC(38:6)_[M+OAC]1- | PS(42:5)_[M-H]1-     |                    |
| 862.5604 PC(38:7)_[M+OAC]1- | PS(42:6)_[M-H]1-     |                    |
| 858.5291 PC(38:9)_[M+OAC]1- | PS(42:8)_[M-H]1-     |                    |
| 866.6411 PC(39:0)_[M+Cl]1-  |                      |                    |
| 890.6856 PC(39:0)_[M+OAC]1- |                      |                    |
| 864.6255 PC(39:1)_[M+Cl]1-  |                      |                    |
| 888.6699 PC(39:1)_[M+OAC]1- | PS(43:0)_[M-H]1-     |                    |
| 862.6098 PC(39:2)_[M+Cl]1-  |                      |                    |
| 886.6543 PC(39:2)_[M+OAC]1- | PS(43:1)_[M-H]1-     |                    |
| 860.5942 PC(39:3)_[M+Cl]1-  |                      |                    |

|                              |                  |
|------------------------------|------------------|
| 858.5785 PC(39:4)_[M+Cl]1-   |                  |
| 882.6230 PC(39:4)_[M+OAC]1-  | PS(43:3)_[M-H]1- |
| 880.6073 PC(39:5)_[M+OAC]1-  | PS(43:4)_[M-H]1- |
| 854.5472 PC(39:6)_[M+Cl]1-   |                  |
| 878.5917 PC(39:6)_[M+OAC]1-  | PS(43:5)_[M-H]1- |
| 876.5760 PC(39:7)_[M+OAC]1-  | PS(43:6)_[M-H]1- |
| 850.5159 PC(39:8)_[M+Cl]1-   |                  |
| 874.5604 PC(39:8)_[M+OAC]1-  | PS(43:7)_[M-H]1- |
| 880.6568 PC(40:0)_[M+Cl]1-   |                  |
| 904.7012 PC(40:0)_[M+OAC]1-  |                  |
| 878.6411 PC(40:1)_[M+Cl]1-   |                  |
| 902.6856 PC(40:1)_[M+OAC]1-  | PS(44:0)_[M-H]1- |
| 884.5447 PC(40:10)_[M+OAC]1- | PS(44:9)_[M-H]1- |
| 876.6255 PC(40:2)_[M+Cl]1-   |                  |
| 900.6699 PC(40:2)_[M+OAC]1-  | PS(44:1)_[M-H]1- |
| 874.6098 PC(40:3)_[M+Cl]1-   |                  |
| 898.6543 PC(40:3)_[M+OAC]1-  | PS(44:2)_[M-H]1- |
| 872.5942 PC(40:4)_[M+Cl]1-   |                  |
| 896.6386 PC(40:4)_[M+OAC]1-  | PS(44:3)_[M-H]1- |
| 894.6230 PC(40:5)_[M+OAC]1-  | PS(44:4)_[M-H]1- |
| 868.5629 PC(40:6)_[M+Cl]1-   |                  |
| 892.6073 PC(40:6)_[M+OAC]1-  | PS(44:5)_[M-H]1- |
| 866.5472 PC(40:7)_[M+Cl]1-   |                  |
| 890.5917 PC(40:7)_[M+OAC]1-  | PS(44:6)_[M-H]1- |
| 864.5316 PC(40:8)_[M+Cl]1-   |                  |
| 862.5159 PC(40:9)_[M+Cl]1-   |                  |
| 886.5604 PC(40:9)_[M+OAC]1-  | PS(44:8)_[M-H]1- |
| 918.7169 PC(41:0)_[M+OAC]1-  |                  |
| 916.7012 PC(41:1)_[M+OAC]1-  |                  |
| 890.6411 PC(41:2)_[M+Cl]1-   |                  |
| 914.6856 PC(41:2)_[M+OAC]1-  |                  |
| 888.6255 PC(41:3)_[M+Cl]1-   |                  |
| 886.6098 PC(41:4)_[M+Cl]1-   |                  |
| 910.6543 PC(41:4)_[M+OAC]1-  |                  |
| 884.5942 PC(41:5)_[M+Cl]1-   |                  |
| 908.6386 PC(41:5)_[M+OAC]1-  |                  |
| 882.5785 PC(41:6)_[M+Cl]1-   |                  |
| 906.6230 PC(41:6)_[M+OAC]1-  |                  |
| 904.6073 PC(41:7)_[M+OAC]1-  |                  |
| 932.7325 PC(42:0)_[M+OAC]1-  |                  |
| 930.7169 PC(42:1)_[M+OAC]1-  |                  |
| 912.5760 PC(42:10)_[M+OAC]1- |                  |
| 910.5604 PC(42:11)_[M+OAC]1- |                  |
| 904.6568 PC(42:2)_[M+Cl]1-   |                  |
| 928.7012 PC(42:2)_[M+OAC]1-  |                  |
| 902.6411 PC(42:3)_[M+Cl]1-   |                  |
| 900.6255 PC(42:4)_[M+Cl]1-   |                  |
| 924.6699 PC(42:4)_[M+OAC]1-  |                  |
| 898.6098 PC(42:5)_[M+Cl]1-   |                  |
| 922.6543 PC(42:5)_[M+OAC]1-  |                  |
| 896.5942 PC(42:6)_[M+Cl]1-   |                  |
| 920.6386 PC(42:6)_[M+OAC]1-  |                  |
| 894.5785 PC(42:7)_[M+Cl]1-   |                  |
| 946.7482 PC(43:0)_[M+OAC]1-  |                  |
| 944.7325 PC(43:1)_[M+OAC]1-  |                  |
| 918.6724 PC(43:2)_[M+Cl]1-   |                  |
| 942.7169 PC(43:2)_[M+OAC]1-  |                  |
| 914.6411 PC(43:4)_[M+Cl]1-   |                  |
| 938.6856 PC(43:4)_[M+OAC]1-  |                  |
| 910.6098 PC(43:6)_[M+Cl]1-   |                  |
| 934.6543 PC(43:6)_[M+OAC]1-  |                  |
| 958.7482 PC(44:1)_[M+OAC]1-  |                  |
| 940.6073 PC(44:10)_[M+OAC]1- |                  |

|           |                       |                    |
|-----------|-----------------------|--------------------|
| 912.5316  | PC(44:12)_[M+Cl]1-    |                    |
| 936.5760  | PC(44:12)_[M+OAc]1-   |                    |
| 956.7325  | PC(44:2)_[M+OAc]1-    |                    |
| 930.6724  | PC(44:3)_[M+Cl]1-     |                    |
| 928.6568  | PC(44:4)_[M+Cl]1-     |                    |
| 952.7012  | PC(44:4)_[M+OAc]1-    |                    |
| 926.6411  | PC(44:5)_[M+Cl]1-     |                    |
| 950.6856  | PC(44:5)_[M+OAc]1-    |                    |
| 924.6255  | PC(44:6)_[M+Cl]1-     |                    |
| 948.6699  | PC(44:6)_[M+OAc]1-    |                    |
| 922.6098  | PC(44:7)_[M+Cl]1-     |                    |
| 920.5942  | PC(44:8)_[M+Cl]1-     |                    |
| 988.7951  | PC(46:0)_[M+OAc]1-    |                    |
| 986.7795  | PC(46:1)_[M+OAc]1-    |                    |
| 984.7638  | PC(46:2)_[M+OAc]1-    |                    |
| 1016.8264 | PC(48:0)_[M+OAc]1-    |                    |
| 1012.7951 | PC(48:1)_[M+OAc]1-    |                    |
| 1044.8577 | PC(50:0)_[M+OAc]1-    |                    |
| 1048.8446 | PC(52:0)_[M+Cl]1-     |                    |
| 1040.7820 | PC(52:4)_[M+Cl]1-     |                    |
| 1064.8264 | PC(52:4)_[M+OAc]1-    |                    |
| 684.5104  | PC-2O(28:0)_[M+Cl]1-  |                    |
| 740.5730  | PC-2O(32:0)_[M+Cl]1-  |                    |
| 768.6043  | PC-2O(34:0)_[M+Cl]1-  |                    |
| 816.6488  | PC-2O(36:1)_[M+OAc]1- | PE(41:0)_[M-H]1-   |
| 852.6982  | PC-2O(40:0)_[M+Cl]1-  |                    |
| 876.7427  | PC-2O(40:0)_[M+OAc]1- |                    |
| 554.3463  | PC-O(16:0)_[M+OAc]1-  |                    |
| 568.3620  | PC-O(17:0)_[M+OAc]1-  |                    |
| 558.3332  | PC-O(18:0)_[M+Cl]1-   |                    |
| 582.3776  | PC-O(18:0)_[M+OAc]1-  |                    |
| 556.3175  | PC-O(18:1)_[M+Cl]1-   |                    |
| 594.3776  | PC-O(19:1)_[M+OAc]1-  |                    |
| 610.4089  | PC-O(20:0)_[M+OAc]1-  |                    |
| 624.4246  | PC-O(21:0)_[M+OAc]1-  |                    |
| 638.4402  | PC-O(22:0)_[M+OAc]1-  |                    |
| 790.5967  | PC-O(33:1)_[M+OAc]1-  | PS-O(37:0)_[M-H]1- |
| 788.5811  | PC-O(33:2)_[M+OAc]1-  | PS-O(37:1)_[M-H]1- |
| 798.5654  | PC-O(34:4)_[M+OAc]1-  | PS-O(38:3)_[M-H]1- |
| 818.6280  | PC-O(35:1)_[M+OAc]1-  | PS-O(39:0)_[M-H]1- |
| 816.6124  | PC-O(35:2)_[M+OAc]1-  | PS-O(39:1)_[M-H]1- |
| 812.5811  | PC-O(35:4)_[M+OAc]1-  | PS-O(39:3)_[M-H]1- |
| 808.5992  | PC-O(36:1)_[M+Cl]1-   |                    |
| 806.5836  | PC-O(36:2)_[M+Cl]1-   |                    |
| 830.6280  | PC-O(36:2)_[M+OAc]1-  | PS-O(40:1)_[M-H]1- |
| 804.5679  | PC-O(36:3)_[M+Cl]1-   |                    |
| 828.6124  | PC-O(36:3)_[M+OAc]1-  | PS-O(40:2)_[M-H]1- |
| 826.5967  | PC-O(36:4)_[M+OAc]1-  | PS-O(40:3)_[M-H]1- |
| 824.5811  | PC-O(36:5)_[M+OAc]1-  | PS-O(40:4)_[M-H]1- |
| 846.6593  | PC-O(37:1)_[M+OAc]1-  | PS-O(41:0)_[M-H]1- |
| 844.6437  | PC-O(37:2)_[M+OAc]1-  | PS-O(41:1)_[M-H]1- |
| 840.6124  | PC-O(37:4)_[M+OAc]1-  |                    |
| 838.6462  | PC-O(38:0)_[M+Cl]1-   |                    |
| 862.6906  | PC-O(38:0)_[M+OAc]1-  |                    |
| 836.6305  | PC-O(38:1)_[M+Cl]1-   |                    |
| 834.6149  | PC-O(38:2)_[M+Cl]1-   |                    |
| 832.5992  | PC-O(38:3)_[M+Cl]1-   |                    |
| 856.6437  | PC-O(38:3)_[M+OAc]1-  | PS-O(42:2)_[M-H]1- |
| 830.5836  | PC-O(38:4)_[M+Cl]1-   |                    |
| 826.5523  | PC-O(38:6)_[M+Cl]1-   |                    |
| 876.7063  | PC-O(39:0)_[M+OAc]1-  |                    |
| 874.6906  | PC-O(39:1)_[M+OAc]1-  |                    |
| 890.7219  | PC-O(40:0)_[M+OAc]1-  |                    |

888.7063 PC-O(40:1)\_[M+OAC]1-  
862.6543 PC-O(40:2)\_[M+Cl]1-  
860.6305 PC-O(40:3)\_[M+Cl]1-  
858.6149 PC-O(40:4)\_[M+Cl]1-  
882.6593 PC-O(40:4)\_[M+OAC]1-  
856.5992 PC-O(40:5)\_[M+Cl]1-  
880.6437 PC-O(40:5)\_[M+OAC]1-  
854.5836 PC-O(40:6)\_[M+Cl]1-  
904.7376 PC-O(41:0)\_[M+OAC]1-  
918.7532 PC-O(42:0)\_[M+OAC]1-  
892.6931 PC-O(42:1)\_[M+Cl]1-  
916.7376 PC-O(42:1)\_[M+OAC]1-  
890.6775 PC-O(42:2)\_[M+Cl]1-  
914.7219 PC-O(42:2)\_[M+OAC]1-  
888.6618 PC-O(42:3)\_[M+Cl]1-  
886.6462 PC-O(42:4)\_[M+Cl]1-  
882.6149 PC-O(42:6)\_[M+Cl]1-  
916.6931 PC-O(44:3)\_[M+Cl]1-  
940.7376 PC-O(44:3)\_[M+OAC]1-  
914.6775 PC-O(44:4)\_[M+Cl]1-  
912.6618 PC-O(44:5)\_[M+Cl]1-  
764.5811 PC-O(31:0)\_[M+OAC]1-  
762.5654 PC-O(31:1)\_[M+OAC]1-  
720.5185 PC-P(28:0)\_[M+OAC]1-  
734.5341 PC-P(29:0)\_[M+OAC]1-  
786.5654 PC-P(33:2)\_[M+OAC]1-  
796.5498 PC-P(34:4)\_[M+OAC]1-  
822.5654 PC-P(36:5)\_[M+OAC]1-  
842.6280 PC-P(37:2)\_[M+OAC]1-  
824.5366 PC-P(38:6)\_[M+Cl]1-  
878.6775 PC-P(41:0)\_[M+Cl]1-  
908.6750 PC-P(42:4)\_[M+OAC]1-  
1033.7347 PE(34:1)-15-isoLG pyrrole  
648.4610 PE(29:0)\_[M-H]1-  
676.4923 PE(31:0)\_[M-H]1-  
674.4766 PE(31:1)\_[M-H]1-  
672.4610 PE(31:2)\_[M-H]1-  
668.4297 PE(31:4)\_[M-H]1-  
690.5079 PE(32:0)\_[M-H]1-  
688.4923 PE(32:1)\_[M-H]1-  
704.5236 PE(33:0)\_[M-H]1-  
696.4610 PE(33:4)\_[M-H]1-  
718.5392 PE(34:0)\_[M-H]1-  
716.5236 PE(34:1)\_[M-H]1-  
714.5079 PE(34:2)\_[M-H]1-  
732.5549 PE(35:0)\_[M-H]1-  
730.5392 PE(35:1)\_[M-H]1-  
726.5079 PE(35:3)\_[M-H]1-  
720.4610 PE(35:6)\_[M-H]1-  
744.5549 PE(36:1)\_[M-H]1-  
742.5392 PE(36:2)\_[M-H]1-  
738.5079 PE(36:4)\_[M-H]1-  
736.4923 PE(36:5)\_[M-H]1-  
734.4766 PE(36:6)\_[M-H]1-  
760.5862 PE(37:0)\_[M-H]1-  
758.5705 PE(37:1)\_[M-H]1-  
756.5549 PE(37:2)\_[M-H]1-  
772.5862 PE(38:1)\_[M-H]1-  
770.5705 PE(38:2)\_[M-H]1-  
766.5392 PE(38:4)\_[M-H]1-  
764.5236 PE(38:5)\_[M-H]1-  
762.5079 PE(38:6)\_[M-H]1-  
788.6175 PE(39:0)\_[M-H]1-  
PS-O(35:0)\_[M-H]1-  
PS-O(32:0)\_[M-H]1-  
PS-O(33:0)\_[M-H]1-  
PS-O(37:2)\_[M-H]1-  
PS-O(38:4)\_[M-H]1-  
PS-O(40:5)\_[M-H]1-

786.6018 PE(39:1)\_[M-H]1-  
784.5862 PE(39:2)\_[M-H]1-  
782.5705 PE(39:3)\_[M-H]1-  
780.5549 PE(39:4)\_[M-H]1-  
776.5236 PE(39:6)\_[M-H]1-  
802.6331 PE(40:0)\_[M-H]1-  
800.6175 PE(40:1)\_[M-H]1-  
798.6018 PE(40:2)\_[M-H]1-  
794.5705 PE(40:4)\_[M-H]1-  
790.5392 PE(40:6)\_[M-H]1-  
788.5236 PE(40:7)\_[M-H]1-  
784.4923 PE(40:9)\_[M-H]1-  
808.5862 PE(41:4)\_[M-H]1-  
828.6488 PE(42:1)\_[M-H]1-  
826.6331 PE(42:2)\_[M-H]1-  
824.6175 PE(42:3)\_[M-H]1-  
818.5705 PE(42:6)\_[M-H]1-  
814.5392 PE(42:8)\_[M-H]1-  
840.6488 PE(43:2)\_[M-H]1-  
854.6644 PE(44:2)\_[M-H]1-  
852.6488 PE(44:3)\_[M-H]1-  
850.6331 PE(44:4)\_[M-H]1-  
884.7114 PE(46:1)\_[M-H]1-  
718.6120 PE-2O(36:0)\_[M-H]1-  
660.4974 PE-O(31:1)\_[M-H]1-  
676.5287 PE-O(32:0)\_[M-H]1-  
674.5130 PE-O(32:1)\_[M-H]1-  
704.5600 PE-O(34:0)\_[M-H]1-  
702.5443 PE-O(34:1)\_[M-H]1-  
700.5287 PE-O(34:2)\_[M-H]1-  
698.5130 PE-O(34:3)\_[M-H]1-  
714.5443 PE-O(35:2)\_[M-H]1-  
732.5913 PE-O(36:0)\_[M-H]1-  
728.5600 PE-O(36:2)\_[M-H]1-  
726.5443 PE-O(36:3)\_[M-H]1-  
724.5287 PE-O(36:4)\_[M-H]1-  
722.5130 PE-O(36:5)\_[M-H]1-  
742.5756 PE-O(37:2)\_[M-H]1-  
760.6226 PE-O(38:0)\_[M-H]1-  
758.6069 PE-O(38:1)\_[M-H]1-  
756.5913 PE-O(38:2)\_[M-H]1-  
754.5756 PE-O(38:3)\_[M-H]1-  
752.5600 PE-O(38:4)\_[M-H]1-  
750.5443 PE-O(38:5)\_[M-H]1-  
748.5287 PE-O(38:6)\_[M-H]1-  
786.6382 PE-O(40:1)\_[M-H]1-  
784.6226 PE-O(40:2)\_[M-H]1-  
782.6069 PE-O(40:3)\_[M-H]1-  
776.5600 PE-O(40:6)\_[M-H]1-  
802.6695 PE-O(41:0)\_[M-H]1-  
816.6852 PE-O(42:0)\_[M-H]1-  
814.6695 PE-O(42:1)\_[M-H]1-  
672.4974 PE-P(32:1)\_[M-H]1-  
720.4974 PE-P(36:5)\_[M-H]1-  
746.5130 PE-P(38:6)\_[M-H]1-  
770.6069 PE-P(39:1)\_[M-H]1-  
774.5443 PE-P(40:6)\_[M-H]1-  
772.5287 PE-P(40:7)\_[M-H]1-  
637.4081 PG(26:0)\_[M-H]1-  
721.5020 PG(32:0)\_[M-H]1-  
733.5020 PG(33:1)\_[M-H]1-  
749.5333 PG(34:0)\_[M-H]1-  
747.5176 PG(34:1)\_[M-H]1-

745.5020 PG(34:2)\_[M-H]1-  
743.4863 PG(34:3)\_[M-H]1-  
741.4707 PG(34:4)\_[M-H]1-  
759.5176 PG(35:2)\_[M-H]1-  
757.5020 PG(35:3)\_[M-H]1-  
777.5646 PG(36:0)\_[M-H]1-  
775.5489 PG(36:1)\_[M-H]1-  
773.5333 PG(36:2)\_[M-H]1-  
771.5176 PG(36:3)\_[M-H]1-  
769.5020 PG(36:4)\_[M-H]1-  
793.5020 PG(38:6)\_[M-H]1-  
749.5702 PG-O(35:0)\_[M-H]1-  
815.6171 PG-O(40:2)\_[M-H]1-  
833.6641 PG-O(41:0)\_[M-H]1-  
835.5858 PG-O(42:6)\_[M-H]1-  
828.4918 PGP(34:1)\_[M-H]1-  
833.5702 PG-P(42:6)\_[M-H]1-  
767.4711 PI(29:0)\_[M-H]1-  
791.4711 PI(31:2)\_[M-H]1-  
807.5024 PI(32:1)\_[M-H]1-  
823.5337 PI(33:0)\_[M-H]1- PA(46:10)\_[M-H]1-  
835.5337 PI(34:1)\_[M-H]1-  
831.5024 PI(34:3)\_[M-H]1-  
851.5650 PI(35:0)\_[M-H]1- PA(48:10)\_[M-H]1-  
847.5337 PI(35:2)\_[M-H]1-  
863.5650 PI(36:1)\_[M-H]1-  
855.5024 PI(36:5)\_[M-H]1-  
879.5963 PI(37:0)\_[M-H]1- PA(50:10)\_[M-H]1-  
875.5650 PI(37:2)\_[M-H]1-  
871.5337 PI(37:4)\_[M-H]1-  
867.5024 PI(37:6)\_[M-H]1-  
893.6119 PI(38:0)\_[M-H]1-  
891.5963 PI(38:1)\_[M-H]1-  
883.5337 PI(38:5)\_[M-H]1-  
907.6276 PI(39:0)\_[M-H]1- PA(52:10)\_[M-H]1-  
903.5963 PI(39:2)\_[M-H]1-  
899.5650 PI(39:4)\_[M-H]1-  
895.5337 PI(39:6)\_[M-H]1-  
911.5650 PI(40:5)\_[M-H]1-  
907.5337 PI(40:7)\_[M-H]1-  
927.5963 PI(41:4)\_[M-H]1-  
925.5806 PI(41:5)\_[M-H]1-  
939.5963 PI(42:5)\_[M-H]1-  
935.5650 PI(42:7)\_[M-H]1-  
957.6432 PI(43:3)\_[M-H]1-  
955.6276 PI(43:4)\_[M-H]1-  
953.6119 PI(43:5)\_[M-H]1-  
971.5650 PI(45:10)\_[M-H]1-  
979.6276 PI(45:6)\_[M-H]1-  
973.5806 PI(45:9)\_[M-H]1-  
991.6276 PI(46:7)\_[M-H]1-  
987.5963 PI(46:9)\_[M-H]1-  
1001.6119 PI(47:9)\_[M-H]1-  
1013.6119 PI(48:10)\_[M-H]1-  
1015.6276 PI(48:9)\_[M-H]1-  
1029.6432 PI(49:9)\_[M-H]1-  
1045.6745 PI(50:8)\_[M-H]1-  
1043.6589 PI(50:9)\_[M-H]1-  
1069.7684 PI(51:3)\_[M-H]1-  
1071.6902 PI(52:9)\_[M-H]1-  
767.5080 PI-O(30:0)\_[M-H]1-  
779.5080 PI-O(31:1)\_[M-H]1-  
807.5393 PI-O(33:1)\_[M-H]1-



823.5706 PI-O(34:0)\_[M-H]1-  
837.5862 PI-O(35:0)\_[M-H]1-  
835.5706 PI-O(35:1)\_[M-H]1-  
833.5549 PI-O(35:2)\_[M-H]1-  
843.5393 PI-O(36:4)\_[M-H]1-  
865.6175 PI-O(37:0)\_[M-H]1-  
863.6019 PI-O(37:1)\_[M-H]1-  
861.5862 PI-O(37:2)\_[M-H]1-  
877.6175 PI-O(38:1)\_[M-H]1-  
893.6488 PI-O(39:0)\_[M-H]1-  
891.6332 PI-O(39:1)\_[M-H]1-  
903.6332 PI-O(40:2)\_[M-H]1-  
921.6801 PI-O(41:0)\_[M-H]1-  
933.6801 PI-O(42:1)\_[M-H]1-  
927.6332 PI-O(42:4)\_[M-H]1-  
664.4195 PS(27:0)\_[M-H]1-  
692.4508 PS(29:0)\_[M-H]1-  
704.4508 PS(30:1)\_[M-H]1-  
780.4821 PS(36:5)\_[M-H]1-  
806.4978 PS(38:6)\_[M-H]1-  
804.4821 PS(38:7)\_[M-H]1-  
830.4978 PS(40:8)\_[M-H]1-  
828.4821 PS(40:9)\_[M-H]1-  
854.4978 PS(42:10)\_[M-H]1-  
852.4821 PS(42:11)\_[M-H]1-  
856.5134 PS(42:9)\_[M-H]1-  
882.5291 PS(44:10)\_[M-H]1-  
678.4715 PS-O(29:0)\_[M-H]1-  
664.4559 PS-O(29:1)\_[M-H]1-  
692.4872 PS-O(30:0)\_[M-H]1-  
690.4715 PS-O(30:1)\_[M-H]1-  
732.5185 PS-O(33:1)\_[M-H]1-  
758.5341 PS-O(35:2)\_[M-H]1-  
676.4559 PS-P(29:0)\_[M-H]1-  
688.4559 PS-P(30:1)\_[M-H]1-  
784.5498 PS-P(37:2)\_[M-H]1-  
749.5814 SM(33:0)\_[M+OAC]1-  
747.5658 SM(33:1)\_[M+OAC]1-  
745.5501 SM(33:2)\_[M+OAC]1-  
763.5971 SM(34:0)\_[M+OAC]1-  
761.5814 SM(34:1)\_[M+OAC]1-  
759.5658 SM(34:2)\_[M+OAC]1-  
777.6127 SM(35:0)\_[M+OAC]1-  
775.5971 SM(35:1)\_[M+OAC]1-  
791.6284 SM(36:0)\_[M+OAC]1-  
789.6127 SM(36:1)\_[M+OAC]1-  
787.5971 SM(36:2)\_[M+OAC]1-  
803.6284 SM(37:1)\_[M+OAC]1-  
819.6597 SM(38:0)\_[M+OAC]1-  
817.6440 SM(38:1)\_[M+OAC]1-  
815.6284 SM(38:2)\_[M+OAC]1-  
831.6597 SM(39:1)\_[M+OAC]1-  
829.6440 SM(39:2)\_[M+OAC]1-  
845.6753 SM(40:1)\_[M+OAC]1-  
843.6597 SM(40:2)\_[M+OAC]1-  
859.6910 SM(41:0)\_[M+OAC]1-  
857.6753 SM(41:1)\_[M+OAC]1-  
875.7223 SM(42:0)\_[M+OAC]1-  
873.7066 SM(42:1)\_[M+OAC]1-  
871.6910 SM(42:2)\_[M+OAC]1-  
869.6753 SM(42:3)\_[M+OAC]1-  
903.7536 SM(44:0)\_[M+OAC]1-  
901.7379 SM(44:1)\_[M+OAC]1-

| <i>m/z</i> | Lipid variable                                   | Positive ionisation mode |          |
|------------|--------------------------------------------------|--------------------------|----------|
|            |                                                  | Isobar 1                 | Isobar 2 |
| 383.367    | Campesterol_[M+H-H2O]1+                          |                          |          |
| 639.608    | Campesteryl ester (16:0)                         |                          |          |
| 667.639    | Campesteryl ester (18:0)                         |                          |          |
| 693.654    | Campesteryl ester (20:1)                         |                          |          |
| 713.621    | Campesteryl ester (20:2)_[M+Na]1+                |                          |          |
| 743.668    | Campesteryl ester (22:1)_[M+Na]1+                |                          |          |
| 736.697    | Campesteryl ester (22:2)_[M+NH4]1+               |                          |          |
| 673.589    | CE(18:01)_[M+Na]1+                               |                          |          |
| 671.574    | CE(18:02)_[M+Na]1+                               |                          |          |
| 701.621    | CE(20:01)_[M+Na]1+                               |                          |          |
| 697.589    | CE(20:03)_[M+Na]1+                               |                          |          |
| 695.574    | CE(20:04)_[M+Na]1+                               |                          |          |
| 690.618    | CE(20:04)_[M+NH4]1+                              |                          |          |
| 725.621    | CE(22:03)_[M+Na]1+                               |                          |          |
| 721.589    | CE(22:05)_[M+Na]1+                               |                          |          |
| 716.634    | CE(22:05)_[M+NH4]1+                              |                          |          |
| 719.574    | CE(22:06)_[M+Na]1+                               |                          |          |
| 714.618    | CE(22:06)_[M+NH4]1+                              | TG_oxid(39:00)           |          |
| 754.744    | CE(24:00)_[M+NH4]1+                              |                          |          |
| 742.707    | CE_oxid(22:00)                                   |                          |          |
| 412.379    | Cer(25:01)                                       |                          |          |
| 440.410    | Cer(27:01)                                       |                          |          |
| 454.426    | Cer(28:01)                                       |                          |          |
| 468.441    | Cer(29:01)                                       |                          |          |
| 536.504    | Cer(34:02)                                       |                          |          |
| 534.525    | Cer(35:01)_[M+H-H2O]1+                           |                          |          |
| 532.509    | Cer(35:02)_[M+H-H2O]1+                           |                          |          |
| 548.540    | Cer(36:01)_[M+H-H2O]1+                           |                          |          |
| 564.535    | Cer(36:02)                                       |                          |          |
| 546.525    | Cer(36:02)_[M+H-H2O]1+                           |                          |          |
| 594.582    | Cer(38:01)                                       |                          |          |
| 576.571    | Cer(38:01)_[M+H-H2O]1+                           |                          |          |
| 592.566    | Cer(38:02)                                       |                          |          |
| 590.587    | Cer(39:01)_[M+H-H2O]1+                           |                          |          |
| 588.571    | Cer(39:02)_[M+H-H2O]1+                           |                          |          |
| 622.613    | Cer(40:01)                                       |                          |          |
| 604.603    | Cer(40:01)_[M+H-H2O]1+                           |                          |          |
| 620.598    | Cer(40:02)                                       |                          |          |
| 618.582    | Cer(40:03)                                       |                          |          |
| 618.618    | Cer(41:01)_[M+H-H2O]1+                           |                          |          |
| 634.613    | Cer(41:02)                                       |                          |          |
| 652.660    | Cer(42:00)                                       |                          |          |
| 650.645    | Cer(42:01)                                       |                          |          |
| 632.634    | Cer(42:01)_[M+H-H2O]1+                           |                          |          |
| 648.629    | Cer(42:02)                                       |                          |          |
| 630.618    | Cer(42:02)_[M+H-H2O]1+                           |                          |          |
| 646.613    | Cer(42:03)                                       |                          |          |
| 660.665    | Cer(44:01)_[M+H-H2O]1+                           |                          |          |
| 658.650    | Cer(44:02)_[M+H-H2O]1+                           |                          |          |
| 674.645    | Cer(44:03)                                       |                          |          |
| 706.707    | Cer(46:01)                                       |                          |          |
| 369.352    | Cholesterol)_[M+H-H2O]1+ lathosterol_[M+H-H2O]1+ |                          |          |
| 383.316    | DG(20:00)_[M+H-H2O]1+                            |                          |          |
| 411.347    | DG(22:00)_[M+H-H2O]1+                            |                          |          |
| 467.410    | DG(26:00)_[M+H-H2O]1+                            |                          |          |
| 465.394    | DG(26:01)_[M+H-H2O]1+                            |                          |          |
| 463.379    | DG(26:02)_[M+H-H2O]1+                            |                          |          |
| 493.425    | DG(28:01)_[M+H-H2O]1+                            |                          |          |
| 491.410    | DG(28:02)_[M+H-H2O]1+                            |                          |          |

507.441 DG(29:01)\_[M+H-H2O]1+  
505.425 DG(29:02)\_[M+H-H2O]1+  
519.441 DG(30:02)\_[M+H-H2O]1+  
533.456 DG(31:02)\_[M+H-H2O]1+  
531.441 DG(31:03)\_[M+H-H2O]1+  
547.472 DG(32:02)\_[M+H-H2O]1+  
545.456 DG(32:03)\_[M+H-H2O]1+  
543.441 DG(32:04)\_[M+H-H2O]1+  
563.503 DG(33:01)\_[M+H-H2O]1+  
561.488 DG(33:02)\_[M+H-H2O]1+  
575.503 DG(34:02)\_[M+H-H2O]1+  
610.541 DG(34:02)\_[M+NH4]1+  
573.488 DG(34:03)\_[M+H-H2O]1+  
591.535 DG(35:01)\_[M+H-H2O]1+  
589.520 DG(35:02)\_[M+H-H2O]1+  
585.488 DG(35:04)\_[M+H-H2O]1+  
583.473 DG(35:05)\_[M+H-H2O]1+  
605.551 DG(36:01)\_[M+H-H2O]1+  
640.588 DG(36:01)\_[M+NH4]1+  
603.535 DG(36:02)\_[M+H-H2O]1+  
601.520 DG(36:03)\_[M+H-H2O]1+  
599.504 DG(36:04)\_[M+H-H2O]1+  
597.488 DG(36:05)\_[M+H-H2O]1+  
619.567 DG(37:01)\_[M+H-H2O]1+  
615.535 DG(37:03)\_[M+H-H2O]1+  
650.572 DG(37:03)\_[M+NH4]1+  
613.520 DG(37:04)\_[M+H-H2O]1+  
646.541 DG(37:05)\_[M+NH4]1+  
633.582 DG(38:01)\_[M+H-H2O]1+  
631.566 DG(38:02)\_[M+H-H2O]1+  
627.535 DG(38:04)\_[M+H-H2O]1+  
662.572 DG(38:04)\_[M+NH4]1+  
623.504 DG(38:06)\_[M+H-H2O]1+  
621.488 DG(38:07)\_[M+H-H2O]1+  
661.613 DG(40:01)\_[M+H-H2O]1+  
659.598 DG(40:02)\_[M+H-H2O]1+  
692.619 DG(40:03)\_[M+NH4]1+  
655.566 DG(40:04)\_[M+H-H2O]1+  
651.535 DG(40:06)\_[M+H-H2O]1+  
686.572 DG(40:06)\_[M+NH4]1+  
649.520 DG(40:07)\_[M+H-H2O]1+  
647.504 DG(40:08)\_[M+H-H2O]1+  
677.645 DG(41:00)\_[M+H-H2O]1+  
712.681 DG(41:00)\_[M+NH4]1+  
675.629 DG(41:01)\_[M+H-H2O]1+  
689.645 DG(42:01)\_[M+H-H2O]1+  
687.629 DG(42:02)\_[M+H-H2O]1+  
683.598 DG(42:04)\_[M+H-H2O]1+  
718.634 DG(42:04)\_[M+NH4]1+  
677.550 DG(42:07)\_[M+H-H2O]1+  
712.588 DG(42:07)\_[M+NH4]1+  
675.535 DG(42:08)\_[M+H-H2O]1+  
671.504 DG(42:10)\_[M+H-H2O]1+  
730.634 DG(43:05)\_[M+NH4]1+  
754.728 DG(44:00)\_[M+NH4]1+  
709.613 DG(44:05)\_[M+H-H2O]1+  
705.582 DG(44:07)\_[M+H-H2O]1+  
740.619 DG(44:07)\_[M+NH4]1+  
703.566 DG(44:08)\_[M+H-H2O]1+ SM(34:01)  
699.535 DG(44:10)\_[M+H-H2O]1+  
695.503 DG(44:12)\_[M+H-H2O]1+  
735.629 DG(46:06)\_[M+H-H2O]1+  
733.613 DG(46:07)\_[M+H-H2O]1+

|         |                        |                     |             |
|---------|------------------------|---------------------|-------------|
| 468.309 | LPC(14:00)             |                     |             |
| 496.340 | LPC(16:00)             |                     |             |
| 494.324 | LPC(16:01)             | LPE(19:01)          |             |
| 510.356 | LPC(17:00)             |                     |             |
| 524.372 | LPC(18:00)             | PC-O(18:00)         |             |
| 522.356 | LPC(18:01)             | PC-O(18:01)         | PC-P(18:00) |
| 520.340 | LPC(18:02)             | PC-O(18:02)         | PC-P(18:01) |
| 568.340 | LPC(22:06)             |                     |             |
| 482.361 | LPC-2O(16:00)          |                     |             |
| 508.376 | LPC-O(18:01)           |                     |             |
| 506.361 | LPC-O(18:02)           | LPC-P(18:01)        |             |
| 478.330 | LPC-P(16:01)           |                     |             |
| 454.293 | LPE(16:00)             | LPC(13:00)          |             |
| 482.324 | LPE(18:00)             | LPC(15:00)          |             |
| 480.309 | LPE(18:01)             | LPC(15:01)          |             |
| 538.387 | LPE(22:00)             | PC-O(19:00)         |             |
| 526.293 | LPE(22:06)             |                     |             |
| 438.298 | LPE-P(16:00)           |                     |             |
| 541.350 | LPG(20:00)             |                     |             |
| 556.361 | LPG(20:01)_[M+NH4]1+   |                     |             |
| 531.272 | LPG(20:05)             | LPG(18:02)_[M+Na]1+ |             |
| 555.366 | LPG(21:00)             |                     |             |
| 573.303 | LPI(16:00)             |                     |             |
| 600.314 | LPI(17:02)_[M+NH4]1+   |                     |             |
| 618.361 | LPI(18:00)_[M+NH4]1+   |                     |             |
| 630.398 | LPI-P(20:00)_[M+NH4]1+ |                     |             |
| 570.280 | LPS(20:03)_[M+Na]1+    | LPS(22:06)          |             |
| 566.249 | LPS(20:05)_[M+Na]1+    |                     |             |
| 398.327 | MG(20:03)_[M+NH4]1+    |                     |             |
| 396.311 | MG(20:04)_[M+NH4]1+    |                     |             |
| 661.384 | PA(32:05)_[M+Na]1+     |                     |             |
| 697.478 | PA(34:01)_[M+Na]1+     |                     |             |
| 735.494 | PA(37:03)_[M+Na]1+     |                     |             |
| 731.462 | PA(37:05)_[M+Na]1+     |                     |             |
| 678.507 | PC(28:00)              | PE(31:00)           |             |
| 706.539 | PC(30:00)              | PE(33:00)           |             |
| 734.570 | PC(32:00)              | PE(35:00)           |             |
| 730.539 | PC(32:02)              | PE(35:02)           |             |
| 760.586 | PC(34:01)              | PE(37:01)           |             |
| 758.570 | PC(34:02)              | PE(37:02)           |             |
| 756.554 | PC(34:03)              | PE(37:03)           |             |
| 754.539 | PC(34:04)              | PE(37:04)           |             |
| 788.617 | PC(36:01)              | PE(39:01)           |             |
| 786.601 | PC(36:02)              | PE(39:02)           |             |
| 784.586 | PC(36:03)              | PE(39:03)           |             |
| 782.570 | PC(36:04)              | PE(39:04)           |             |
| 780.554 | PC(36:05)              | PE(39:05)           |             |
| 776.523 | PC(36:07)              | PE(39:07)           |             |
| 816.648 | PC(38:01)              | PE(41:01)           |             |
| 814.633 | PC(38:02)              | PE(41:02)           |             |
| 812.617 | PC(38:03)              | PE(41:03)           |             |
| 810.601 | PC(38:04)              | PE(41:04)           |             |
| 808.586 | PC(38:05)              | PE(41:05)           |             |
| 806.570 | PC(38:06)              | PE(41:06)           |             |
| 804.554 | PC(38:07)              |                     |             |
| 802.538 | PC(38:08)              |                     |             |
| 800.523 | PC(38:09)              |                     |             |
| 846.695 | PC(40:00)              | PE(43:00)           |             |
| 844.680 | PC(40:01)              | PE(43:01)           |             |
| 842.664 | PC(40:02)              | PE(43:02)           |             |
| 840.648 | PC(40:03)              | PE(43:03)           |             |
| 838.633 | PC(40:04)              | PE(43:04)           |             |
| 834.601 | PC(40:06)              | PE(43:06)           |             |

|         |              |                     |                     |
|---------|--------------|---------------------|---------------------|
| 832.586 | PC(40:07)    | PE(43:07)           |                     |
| 830.570 | PC(40:08)    | PE(43:08)           |                     |
| 828.554 | PC(40:09)    | PE(43:09)           |                     |
| 872.711 | PC(42:01)    | PE(45:01)           |                     |
| 870.695 | PC(42:02)    | PE(45:02)           |                     |
| 868.679 | PC(42:03)    | PE(45:03)           |                     |
| 866.663 | PC(42:04)    | PE(45:04)           |                     |
| 864.648 | PC(42:05)    | PE(45:05)           |                     |
| 860.616 | PC(42:07)    | PE(45:07)           |                     |
| 858.601 | PC(42:08)    | PE(45:08)           |                     |
| 852.554 | PC(42:11)    | PE(45:11)           |                     |
| 902.758 | PC(44:00)    | PE(47:00)           |                     |
| 900.742 | PC(44:01)    | PE(47:01)           |                     |
| 650.548 | PC-2O(28:00) |                     |                     |
| 496.340 | LPC(16:00)   | LPE(19:00)          |                     |
| 522.355 | LPC(18:01)   | LPE(21:01)          |                     |
| 550.387 | LPC(20:01)   | LPE(23:01)          |                     |
| 664.528 | PC-O(28:00)  |                     |                     |
| 654.450 | PC-O(28:05)  | PC-P(28:04)         |                     |
| 720.591 | PC-O(32:00)  |                     |                     |
| 718.575 | PC-O(32:01)  | PC-P(32:00)         |                     |
| 730.575 | PC-O(33:02)  | PC-P(33:01)         |                     |
| 748.622 | PC-O(34:00)  |                     |                     |
| 746.606 | PC-O(34:01)  | PC-P(34:00)         |                     |
| 744.590 | PC-O(34:02)  | PE-O(37:02)         |                     |
| 776.653 | PC-O(36:00)  |                     |                     |
| 774.638 | PC-O(36:01)  | PE-P(39:00)         |                     |
| 772.622 | PC-O(36:02)  | PE-P(39:01)         | TG_oxid(44:06)      |
| 766.575 | PC-O(36:05)  | PC-P(36:04)         |                     |
| 804.685 | PC-O(38:00)  |                     |                     |
| 800.653 | PC-O(38:02)  | PE-P(41:01)         |                     |
| 830.700 | PC-O(40:01)  | PC-P(40:00)         |                     |
| 828.684 | PC-O(40:02)  | PC-P(40:01)         |                     |
| 826.669 | PC-O(40:03)  | PC-P(40:02)         |                     |
| 822.637 | PC-O(40:05)  | PC-P(40:04)         |                     |
| 814.575 | PC-O(40:09)  | PC-P(40:08)         |                     |
| 852.684 | PC-O(42:04)  | PC-P(42:03)         |                     |
| 850.669 | PC-O(42:05)  | PC-P(42:04)         |                     |
| 838.575 | PC-O(42:11)  | PC-P(42:10)         |                     |
| 906.732 | PC-O(46:05)  | PC-P(46:03)         |                     |
| 902.700 | PC-O(46:07)  | PC-P(46:06)         |                     |
| 942.826 | PC-O(48:01)  |                     |                     |
| 816.591 | PC-O(40:08)  | PC-P(40:07)         |                     |
| 836.653 | PC-O(41:05)  | PC-P(41:04)         |                     |
| 852.685 | PC-O(42:04)  | PC-P(42:03)         |                     |
| 680.429 | PE(32:06)    |                     |                     |
| 696.460 | PE(33:05)    | PA(35:06)_[M+NH4]1+ |                     |
| 720.554 | PE(34:00)    | PC(31:00)           |                     |
| 718.539 | PE(34:01)    | PC(31:01)           |                     |
| 716.523 | PE(34:02)    | PC(31:02)           |                     |
| 748.586 | PE(36:00)    | PC(33:00)           |                     |
| 744.554 | PE(36:02)    | PC(33:02)           |                     |
| 742.539 | PE(36:03)    | PC(33:03)           |                     |
| 736.491 | PE(36:06)    | PC(33:06)           | PA(38:07)_[M+NH4]1+ |
| 774.601 | PE(38:01)    | PC(35:01)           |                     |
| 772.586 | PE(38:02)    | PC(35:02)           |                     |
| 764.523 | PE(38:06)    | PC(35:06)           |                     |
| 804.648 | PE(40:00)    | PC(37:00)           | PA(42:01)_[M+NH4]1+ |
| 802.633 | PE(40:01)    | PC(37:01)           |                     |
| 800.617 | PE(40:02)    | PC(37:02)           |                     |
| 798.601 | PE(40:03)    | PC(37:03)           |                     |
| 796.586 | PE(40:04)    | PC(37:04)           |                     |
| 792.554 | PE(40:06)    | PC(37:06)           |                     |

|                               |                    |             |
|-------------------------------|--------------------|-------------|
| 830.664 PE(42:01)             | PC(39:01)          |             |
| 828.648 PE(42:02)             | PC(39:02)          |             |
| 822.601 PE(42:05)             | PC(39:05)          |             |
| 814.539 PE(42:09)             | PE(39:09)          |             |
| 858.695 PE(44:01)             | PC(41:01)          |             |
| 886.727 PE(46:01)             | PC(43:01)          |             |
| 878.664 PE(46:05)             | PC(43:05)          |             |
| 676.528 PE-O(32:01)           | PC-P(29:00)        |             |
| 700.528 PE-O(34:03)           | PC-O(31:03)        |             |
| 728.559 PE-O(36:03)           | PC-O(33:03)        |             |
| 726.543 PE-O(36:04)           | PC-O(33:04)        |             |
| 756.590 PE-O(38:03)           | PC-O(35:01)        | PC-P(35:02) |
| 754.575 PE-O(38:04)           | PC-O(35:04)        |             |
| 752.559 PE-O(38:05)           | PC-O(35:05)        |             |
| 786.637 PE-O(40:02)           | PC-O(37:02)        |             |
| 784.622 PE-O(40:03)           | PC-P(37:02)        |             |
| 782.606 PE-O(40:04)           | PC-O(37:04)        |             |
| 780.590 PE-O(40:05)           |                    |             |
| 778.575 PE-O(40:06)           |                    |             |
| 810.637 PE-O(42:04)           |                    |             |
| 806.606 PE-O(42:06)           |                    |             |
| 674.512 PE-P(32:01)           |                    |             |
| 748.528 PE-P(38:06)           |                    |             |
| 774.543 PE-P(40:07)           |                    |             |
| 611.392 PG(24:00)             |                    |             |
| 642.434 PG(25:00)_[M+NH4]1+   |                    |             |
| 656.450 PG(26:00)_[M+NH4]1+   |                    |             |
| 653.439 PG(27:00)             |                    |             |
| 698.497 PG(29:00)_[M+NH4]1+   |                    |             |
| 712.512 PG(30:00)_[M+NH4]1+   |                    |             |
| 743.483 PG(32:01)_[M+Na]1+    | PG(34:04)          |             |
| 749.533 PG(34:01)             |                    |             |
| 771.515 PG(34:01)_[M+Na]1+    | PG(36:04)          |             |
| 747.517 PG(34:02)             |                    |             |
| 779.580 PG(36:00)             |                    |             |
| 801.562 PG(36:00)_[M+Na]1+    |                    |             |
| 799.546 PG(36:01)_[M+Na]1+    | PG(38:04)          |             |
| 775.548 PG(36:02)             |                    |             |
| 797.530 PG(36:02)_[M+Na]1+    |                    |             |
| 807.611 PG(38:00)             |                    |             |
| 801.564 PG(38:03)             |                    |             |
| 797.533 PG(38:05)             |                    |             |
| 817.499 PG(38:06)_[M+Na]1+    |                    |             |
| 791.486 PG(38:08)             |                    |             |
| 831.515 PG(39:06)_[M+Na]1+    |                    |             |
| 829.499 PG(39:07)_[M+Na]1+    |                    |             |
| 833.627 PG(40:01)             |                    |             |
| 845.530 PG(40:06)_[M+Na]1+    | PG(42:09)          |             |
| 843.515 PG(40:07)_[M+Na]1+    |                    |             |
| 866.685 PG(41:00)_[M+NH4]1+   |                    |             |
| 857.530 PG(41:07)_[M+Na]1+    |                    |             |
| 709.538 PG-O(32:00)           |                    |             |
| 768.611 PG-O(35:00)_[M+NH4]1+ |                    |             |
| 779.616 PG-O(37:00)           | TG(45:04)_[M+Na]1+ |             |
| 777.600 PG-O(37:01)           | TG(45:05)_[M+Na]1+ |             |
| 791.616 PG-O(38:01)           | TG(46:05)_[M+Na]1+ |             |
| 835.679 PG-O(41:00)           | TG(49:04)_[M+Na]1+ |             |
| 852.705 PG-O(41:00)_[M+NH4]1+ |                    |             |
| 859.582 PG-O(42:06)_[M+Na]1+  |                    |             |
| 725.424 PI(26:01)             |                    |             |
| 755.471 PI(28:00)             |                    |             |
| 768.466 PI(28:02)_[M+NH4]1+   |                    |             |
| 769.486 PI(29:00)             |                    |             |

|         |                       |                     |
|---------|-----------------------|---------------------|
| 784.497 | PI(29:01)_[M+NH4]1+   |                     |
| 800.528 | PI(30:00)_[M+NH4]1+   |                     |
| 795.502 | PI(31:01)             |                     |
| 824.528 | PI(32:02)_[M+NH4]1+   |                     |
| 820.497 | PI(32:04)_[M+NH4]1+   |                     |
| 821.518 | PI(33:02)             |                     |
| 838.544 | PI(33:02)_[M+NH4]1+   |                     |
| 832.497 | PI(33:05)_[M+NH4]1+   |                     |
| 856.591 | PI(34:00)_[M+NH4]1+   | PC(42:09)           |
| 837.549 | PI(34:01)             |                     |
| 859.531 | PI(34:01)_[M+Na]1+    | PI(36:04)           |
| 835.533 | PI(34:02)             |                     |
| 857.515 | PI(34:02)_[M+Na]1+    |                     |
| 831.502 | PI(34:04)             |                     |
| 829.486 | PI(34:05)             |                     |
| 866.575 | PI(35:02)_[M+NH4]1+   |                     |
| 845.518 | PI(35:04)             | PI(33:01)_[M+Na]1+  |
| 862.544 | PI(35:04)_[M+NH4]1+   |                     |
| 860.528 | PI(35:05)_[M+NH4]1+   |                     |
| 858.513 | PI(35:06)_[M+NH4]1+   |                     |
| 867.596 | PI(36:00)             |                     |
| 887.562 | PI(36:01)_[M+Na]1+    | PI(38:04)           |
| 882.607 | PI(36:01)_[M+NH4]1+   |                     |
| 885.546 | PI(36:02)_[M+Na]1+    | PI(38:05)           |
| 878.569 | PI(36:03)_[M+NH4]1+   | PC(44:12)           |
| 881.515 | PI(36:04)_[M+Na]1+    | PI(38:07)           |
| 857.518 | PI(36:05)             |                     |
| 898.638 | PI(37:00)_[M+NH4]1+   |                     |
| 879.596 | PI(37:01)             |                     |
| 873.549 | PI(37:04)             |                     |
| 871.533 | PI(37:05)             |                     |
| 888.560 | PI(37:05)_[M+NH4]1+   |                     |
| 909.546 | PI(38:04)_[M+Na]1+    | PI(40:07)           |
| 904.591 | PI(38:04)_[M+NH4]1+   |                     |
| 883.533 | PI(38:06)             |                     |
| 905.611 | PI(39:02)             |                     |
| 814.580 | PI-O(32:00)_[M+NH4]1+ |                     |
| 817.520 | PI-O(32:01)_[M+Na]1+  |                     |
| 824.565 | PI-O(33:02)_[M+NH4]1+ |                     |
| 819.538 | PI-O(34:03)           |                     |
| 841.520 | PI-O(34:03)_[M+Na]1+  | PI-P(36:05)         |
| 817.523 | PI-O(34:04)           |                     |
| 867.536 | PI-O(36:04)_[M+Na]1+  | PI-P(38:06)         |
| 860.565 | PI-O(36:05)_[M+NH4]1+ |                     |
| 867.632 | PI-O(37:00)           |                     |
| 893.648 | PI-O(39:01)           |                     |
| 775.473 | PI-P(29:00)_[M+Na]1+  |                     |
| 787.473 | PI-P(30:01)_[M+Na]1+  |                     |
| 779.507 | PI-P(31:01)           |                     |
| 796.533 | PI-P(31:01)_[M+NH4]1+ |                     |
| 815.507 | PI-P(34:04)           |                     |
| 858.549 | PI-P(36:05)_[M+NH4]1+ |                     |
| 861.585 | PI-P(37:02)           |                     |
| 646.369 | PS(24:00)_[M+Na]1+    |                     |
| 650.403 | PS(26:01)             |                     |
| 722.497 | PS(31:00)             | PG(31:02)_[M+NH4]1+ |
| 718.465 | PS(31:02)             | PG(31:04)_[M+NH4]1+ |
| 746.497 | PS(33:02)             | PG(33:04)_[M+NH4]1+ |
| 784.510 | PS(34:01)             |                     |
| 794.497 | PS(35:03)             | PS(37:06)           |
| 792.479 | PS(35:04)             |                     |
| 768.481 | PS(35:05)             |                     |
| 784.512 | PS(36:04)             | PG(36:06)_[M+NH4]1+ |

|                              |                     |                     |
|------------------------------|---------------------|---------------------|
| 780.479 PS(36:06)            | PG(36:08)_[M+NH4]1+ | PS(34:03)_[M+Na]1+  |
| 802.559 PS(37:02)            | PG(37:04)_[M+NH4]1+ |                     |
| 800.544 PS(37:03)            | PG(37:05)_[M+NH4]1+ |                     |
| 822.526 PS(37:03)            |                     |                     |
| 820.510 PS(37:04)            |                     |                     |
| 818.591 PS(38:01)            | PG(38:03)_[M+NH4]1+ |                     |
| 812.544 PS(38:04)            | PG(38:06)_[M+NH4]1+ | PS(36:01)_[M+Na]1+  |
| 806.497 PS(38:07)            | PG(38:09)_[M+NH4]1+ | PS(36:04)_[M+Na]1+  |
| 822.528 PS(39:06)            | PG(39:08)_[M+NH4]1+ |                     |
| 844.510 PS(39:06)            |                     |                     |
| 820.512 PS(39:07)            |                     |                     |
| 842.588 PS(40:03)            | PG(40:05)_[M+NH4]1+ | PS(38:00)_[M+Na]1+  |
| 862.559 PS(40:04)_[M+Na]1+   | PS(42:07)           | PG(42:09)_[M+NH4]1+ |
| 860.541 PS(40:05)_[M+Na]1+   | PS(42:08)           | PG(42:10)_[M+NH4]1+ |
| 836.544 PS(40:06)            | PG(40:08)_[M+NH4]1+ | PS(38:03)_[M+Na]1+  |
| 834.528 PS(40:07)            | PG(40:09)_[M+NH4]1+ | PS(38:04)_[M+Na]1+  |
| 856.510 PS(40:07)_[M+Na]1+   | PS(42:10)           |                     |
| 832.512 PS(40:08)            | PG(40:10)_[M+NH4]1+ | PS(38:05)_[M+Na]1+  |
| 830.497 PS(40:09)            |                     |                     |
| 858.622 PS(41:02)            | PG(41:04)_[M+NH4]1+ |                     |
| 856.606 PS(41:03)            | PG(41:05)_[M+NH4]1+ |                     |
| 848.544 PS(41:07)            | PS(39:04)_[M+Na]1+  |                     |
| 872.638 PS(42:02)            | PG(42:04)_[M+NH4]1+ |                     |
| 894.620 PS(42:02)            |                     |                     |
| 880.510 PS(42:09)            |                     |                     |
| 876.479 PS(42:11)            |                     |                     |
| 908.635 PS(43:02)            |                     |                     |
| 922.651 PS(44:02)            |                     |                     |
| 888.573 PS(44:08)            | PG(44:10)_[M+NH4]1+ | PS(42:05)_[M+Na]1+  |
| 910.557 PS(44:08)_[M+Na]1+   | PI(39:08)_[M+NH4]1+ |                     |
| 884.544 PS(44:10)            | PG(44:12)_[M+NH4]1+ | PS(42:07)_[M+Na]1+  |
| 816.515 PS-O(38:06)_[M+Na]1+ |                     |                     |
| 840.609 PS-O(39:01)_[M+Na]1+ |                     |                     |
| 842.531 PS-P(40:06)_[M+Na]1+ |                     |                     |
| 687.544 SM(33:02)            |                     |                     |
| 701.559 SM(34:02)            |                     |                     |
| 719.606 SM(35:00)            |                     |                     |
| 731.606 SM(36:01)            |                     |                     |
| 729.591 SM(36:02)            |                     |                     |
| 725.559 SM(36:04)            |                     |                     |
| 759.638 SM(38:01)            |                     |                     |
| 757.622 SM(38:02)            |                     |                     |
| 753.591 SM(38:04)            |                     |                     |
| 789.684 SM(40:00)            |                     |                     |
| 787.669 SM(40:01)            |                     |                     |
| 785.653 SM(40:02)            |                     |                     |
| 803.700 SM(41:00)            |                     |                     |
| 801.684 SM(41:00)            |                     |                     |
| 817.716 SM(42:00)            |                     |                     |
| 815.700 SM(42:01)            |                     |                     |
| 813.684 SM(42:02)            |                     |                     |
| 811.669 SM(42:03)            |                     |                     |
| 825.685 SM(43:03)            |                     |                     |
| 823.669 SM(43:04)            |                     |                     |
| 845.747 SM(44:00)            |                     |                     |
| 837.685 SM(44:04)            |                     |                     |
| 835.669 SM(44:05)            |                     |                     |
| 873.778 SM(46:00)            |                     |                     |
| 871.763 SM(46:01)            |                     |                     |
| 899.794 SM(48:01)            |                     |                     |
| 614.536 TG(33:00)            |                     |                     |
| 642.567 TG(35:00)            |                     |                     |
| 640.552 TG(35:01)            |                     |                     |



|                             |                       |             |
|-----------------------------|-----------------------|-------------|
| 661.538 TG(36:00)_[M+Na]1+  |                       |             |
| 675.553 TG(37:00)_[M+Na]1+  |                       |             |
| 689.569 TG(38:00)_[M+Na]1+  | SM(33:01)             |             |
| 678.567 TG(38:03)           |                       |             |
| 674.536 TG(38:05)           |                       |             |
| 717.600 TG(40:00)_[M+Na]1+  | SM(35:01)             |             |
| 712.645 TG(40:00)_[M+NH4]1+ |                       |             |
| 727.585 TG(41:02)_[M+Na]1+  |                       |             |
| 740.676 TG(42:00)_[M+NH4]1+ |                       |             |
| 743.616 TG(42:01)_[M+Na]1+  |                       |             |
| 741.600 TG(42:02)_[M+Na]1+  |                       |             |
| 736.645 TG(42:02)_[M+NH4]1+ |                       |             |
| 732.614 TG(42:04)_[M+NH4]1+ |                       |             |
| 752.676 TG(43:01)_[M+NH4]1+ |                       |             |
| 755.616 TG(43:02)_[M+Na]1+  |                       |             |
| 748.645 TG(43:03)_[M+NH4]1+ |                       |             |
| 764.676 TG(44:02)_[M+NH4]1+ |                       |             |
| 762.661 TG(44:03)_[M+NH4]1+ |                       |             |
| 783.647 TG(45:02)_[M+Na]1+  |                       |             |
| 776.677 TG(45:03)           |                       |             |
| 781.632 TG(45:03)_[M+Na]1+  |                       |             |
| 774.661 TG(45:04)_[M+NH4]1+ |                       |             |
| 796.739 TG(46:00)_[M+NH4]1+ |                       |             |
| 799.679 TG(46:01)_[M+Na]1+  | SM(41:01)             |             |
| 794.723 TG(46:01)_[M+NH4]1+ |                       |             |
| 797.663 TG(46:02)_[M+Na]1+  |                       |             |
| 792.708 TG(46:02)_[M+NH4]1+ |                       |             |
| 790.692 TG(46:03)_[M+NH4]1+ |                       |             |
| 788.676 TG(46:04)_[M+NH4]1+ |                       |             |
| 786.661 TG(46:05)_[M+NH4]1+ |                       |             |
| 784.645 TG(46:06)_[M+NH4]1+ |                       |             |
| 809.663 TG(47:03)_[M+Na]1+  |                       |             |
| 807.647 TG(47:04)_[M+Na]1+  | SM(42:05)             | PG-O(39:00) |
| 829.726 TG(48:00)_[M+Na]1+  |                       |             |
| 827.710 TG(48:01)_[M+Na]1+  |                       |             |
| 822.755 TG(48:01)_[M+NH4]1+ |                       |             |
| 820.739 TG(48:02)_[M+NH4]1+ |                       |             |
| 818.723 TG(48:03)_[M+NH4]1+ |                       |             |
| 816.708 TG(48:04)_[M+NH4]1+ |                       |             |
| 814.692 TG(48:05)_[M+NH4]1+ |                       |             |
| 812.676 TG(48:06)_[M+NH4]1+ |                       |             |
| 841.726 TG(49:01)_[M+Na]1+  |                       |             |
| 836.770 TG(49:01)_[M+NH4]1+ |                       |             |
| 837.694 TG(49:03)_[M+Na]1+  |                       |             |
| 832.739 TG(49:03)_[M+NH4]1+ |                       |             |
| 830.723 TG(49:04)_[M+NH4]1+ |                       |             |
| 833.663 TG(49:05)_[M+Na]1+  | SM(44:06)             | PG-P(41:00) |
| 831.647 TG(49:06)_[M+Na]1+  |                       |             |
| 857.757 TG(50:00)_[M+Na]1+  |                       |             |
| 855.741 TG(50:01)_[M+Na]1+  |                       |             |
| 850.786 TG(50:01)_[M+NH4]1+ |                       |             |
| 848.770 TG(50:02)_[M+NH4]1+ |                       |             |
| 846.755 TG(50:03)_[M+NH4]1+ |                       |             |
| 844.739 TG(50:04)_[M+NH4]1+ |                       |             |
| 840.708 TG(50:06)_[M+NH4]1+ |                       |             |
| 838.692 TG(50:07)_[M+NH4]1+ | PG-O(40:00)_[M+NH4]1+ |             |
| 832.645 TG(50:10)_[M+NH4]1+ |                       |             |
| 866.817 TG(51:00)_[M+NH4]1+ |                       |             |
| 864.802 TG(51:01)_[M+NH4]1+ |                       |             |
| 858.755 TG(51:04)_[M+NH4]1+ |                       |             |
| 883.773 TG(52:01)_[M+Na]1+  |                       |             |
| 878.817 TG(52:01)_[M+NH4]1+ |                       |             |
| 881.757 TG(52:02)_[M+Na]1+  |                       |             |

876.802 TG(52:02)\_[M+NH4]1+  
879.741 TG(52:03)\_[M+Na]1+  
874.786 TG(52:03)\_[M+NH4]1+  
872.770 TG(52:04)\_[M+NH4]1+  
870.755 TG(52:05)\_[M+NH4]1+  
868.739 TG(52:06)\_[M+NH4]1+  
890.817 TG(53:02)\_[M+NH4]1+  
888.802 TG(53:03)\_[M+NH4]1+  
884.770 TG(53:05)\_[M+NH4]1+  
880.739 TG(53:07)\_[M+NH4]1+  
874.692 TG(53:10)\_[M+NH4]1+  
911.804 TG(54:01)\_[M+Na]1+  
906.848 TG(54:01)\_[M+NH4]1+  
909.788 TG(54:02)\_[M+Na]1+  
904.833 TG(54:02)\_[M+NH4]1+  
902.817 TG(54:03)\_[M+NH4]1+  
900.802 TG(54:04)\_[M+NH4]1+  
903.741 TG(54:05)\_[M+Na]1+  
898.786 TG(54:05)\_[M+NH4]1+  
896.770 TG(54:06)\_[M+NH4]1+  
894.755 TG(54:07)\_[M+NH4]1+  
892.739 TG(54:08)\_[M+NH4]1+  
891.647 TG(54:11)\_[M+Na]1+  
918.848 TG(55:02)\_[M+NH4]1+  
916.833 TG(55:03)\_[M+NH4]1+  
914.817 TG(55:04)\_[M+NH4]1+  
912.802 TG(55:05)\_[M+NH4]1+  
908.770 TG(55:07)\_[M+NH4]1+  
906.755 TG(55:08)\_[M+NH4]1+  
902.723 TG(55:10)\_[M+NH4]1+  
934.880 TG(56:01)\_[M+NH4]1+  
930.848 TG(56:03)\_[M+NH4]1+  
928.833 TG(56:04)\_[M+NH4]1+  
926.817 TG(56:05)\_[M+NH4]1+  
924.802 TG(56:06)\_[M+NH4]1+  
922.786 TG(56:07)\_[M+NH4]1+  
920.770 TG(56:08)\_[M+NH4]1+  
918.755 TG(56:09)\_[M+NH4]1+  
961.820 TG(58:04)\_[M+Na]1+  
956.864 TG(58:04)\_[M+NH4]1+  
954.848 TG(58:05)\_[M+NH4]1+  
952.833 TG(58:06)\_[M+NH4]1+  
948.802 TG(58:08)\_[M+NH4]1+  
946.786 TG(58:09)\_[M+NH4]1+  
944.770 TG(58:10)\_[M+NH4]1+  
986.911 TG(60:03)\_[M+NH4]1+  
989.851 TG(60:04)\_[M+Na]1+  
982.880 TG(60:05)\_[M+NH4]1+  
976.833 TG(60:08)\_[M+NH4]1+  
974.817 TG(60:09)\_[M+NH4]1+  
990.848 TG(61:08)\_[M+NH4]1+  
1025.757 TG(64:14)\_[M+Na]1+  
668.546 TG\_oxid(36:02)  
686.593 TG\_oxid(37:00)  
696.577 TG\_oxid(38:02)  
722.593 TG\_oxid(40:03)  
740.640 TG\_oxid(41:01)  
738.624 TG\_oxid(41:02)  
750.624 TG\_oxid(42:03)  
748.609 TG\_oxid(42:04)  
766.655 TG\_oxid(43:02)  
764.640 TG\_oxid(43:03)  
780.671 TG\_oxid(44:02)

776.640 TG\_oxid(44:04)  
798.718 TG\_oxid(45:00)  
794.687 TG\_oxid(45:02)  
790.655 TG\_oxid(45:04)  
808.702 TG\_oxid(46:02)  
806.687 TG\_oxid(46:03)  
804.671 TG\_oxid(46:04)  
840.765 TG\_oxid(48:00)  
830.687 TG\_oxid(48:05)  
862.749 TG\_oxid(50:03)  
892.796 TG\_oxid(52:02)  
884.734 TG\_oxid(52:06)  
908.828 TG\_oxid(53:01)  
920.828 TG\_oxid(54:02)  
918.812 TG\_oxid(54:03)  
916.796 TG\_oxid(54:04)  
946.843 TG\_oxid(56:03)  
958.843 TG\_oxid(57:04)  
954.812 TG\_oxid(57:06)  
950.781 TG\_oxid(57:08)  
944.734 TG\_oxid(57:11)  
1006.749 TG\_oxid(62:15)  
1034.781 TG\_oxid(64:15)
